# Supplementary material for: Wnt11 acts on dermomyotome cells to guide epaxial myotome morphogenesis
Source: eLife. 2022 May 6;11:e71845. doi: 10.7554/eLife.71845 (PMC9075960; doi:10.7554/eLife.71845)
Supplement: Supplementary file 2. [file elife-71845-supp2.xlsx]

## Sheet: Sheet1
Analysis Type:	PANTHER Overrepresentation Test (Released 20210224)
Annotation Version and Release Date:	GO Ontology database DOI: 10.5281/zenodo.4495804 Released 2021-02-01
Analyzed List:	dorsal_Zic1Targets (Oryzias latipes)
Reference List:	Oryzias latipes (all genes in database)
Test Type:	FISHER
Correction:	FDR
GO biological process complete	Oryzias latipes - REFLIST (23607)	dorsal_Zic1Targets (324)	dorsal_Zic1Targets (expected)	dorsal_Zic1Targets (over/under)	dorsal_Zic1Targets (fold Enrichment)	dorsal_Zic1Targets (raw P-value)	dorsal_Zic1Targets (FDR)
anatomical structure development (GO:0048856)	3288	125	45.13	+	2.77	1.34e-27	1.14e-23
developmental process (GO:0032502)	3449	127	47.34	+	2.68	7.52e-27	3.2e-23
multicellular organism development (GO:0007275)	3004	117	41.23	+	2.84	2.03e-26	5.76e-23
system development (GO:0048731)	2562	99	35.16	+	2.82	1.28e-21	2.73e-18
anatomical structure morphogenesis (GO:0009653)	1504	74	20.64	+	3.58	1.75e-21	2.99e-18
multicellular organismal process (GO:0032501)	3747	121	51.43	+	2.35	1.95e-20	2.76e-17
nervous system development (GO:0007399)	1241	61	17.03	+	3.58	1.22e-17	1.49e-14
tissue development (GO:0009888)	986	53	13.53	+	3.92	6.63e-17	7.06e-14
animal organ development (GO:0048513)	1739	71	23.87	+	2.97	2.12e-16	2.01e-13
locomotion (GO:0040011)	735	43	10.09	+	4.26	4.87e-15	4.15e-12
cell development (GO:0048468)	958	47	13.15	+	3.57	1.15e-13	8.92e-11
axon guidance (GO:0007411)	213	23	2.92	+	7.87	1.75e-13	1.24e-10
neuron projection guidance (GO:0097485)	214	23	2.94	+	7.83	1.91e-13	1.25e-10
neurogenesis (GO:0022008)	799	42	10.97	+	3.83	3.15e-13	1.92e-10
regulation of developmental process (GO:0050793)	591	36	8.11	+	4.44	3.18e-13	1.8e-10
movement of cell or subcellular component (GO:0006928)	889	44	12.2	+	3.61	5.77e-13	3.07e-10
generation of neurons (GO:0048699)	746	40	10.24	+	3.91	6.72e-13	3.37e-10
axonogenesis (GO:0007409)	297	25	4.08	+	6.13	2.56e-12	1.21e-09
axon development (GO:0061564)	311	25	4.27	+	5.86	6.51e-12	2.92e-09
cell differentiation (GO:0030154)	1695	61	23.26	+	2.62	7.95e-12	3.39e-09
cellular developmental process (GO:0048869)	1707	61	23.43	+	2.6	1.05e-11	4.28e-09
cell morphogenesis involved in neuron differentiation (GO:0048667)	321	25	4.41	+	5.67	1.23e-11	4.77e-09
neuron differentiation (GO:0030182)	677	36	9.29	+	3.87	1.31e-11	4.85e-09
regulation of biological process (GO:0050789)	8123	171	111.49	+	1.53	1.88e-11	6.69e-09
regulation of cell differentiation (GO:0045595)	300	24	4.12	+	5.83	1.91e-11	6.52e-09
biological regulation (GO:0065007)	8948	183	122.81	+	1.49	2.13e-11	7e-09
cell morphogenesis involved in differentiation (GO:0000904)	371	26	5.09	+	5.11	4.22e-11	1.33e-08
neuron projection morphogenesis (GO:0048812)	343	25	4.71	+	5.31	4.65e-11	1.41e-08
plasma membrane bounded cell projection morphogenesis (GO:0120039)	343	25	4.71	+	5.31	4.65e-11	1.37e-08
cell projection morphogenesis (GO:0048858)	345	25	4.74	+	5.28	5.22e-11	1.48e-08
cell morphogenesis (GO:0000902)	439	28	6.03	+	4.65	5.78e-11	1.59e-08
regulation of axonogenesis (GO:0050770)	84	14	1.15	+	12.14	6.17e-11	1.64e-08
cell part morphogenesis (GO:0032990)	351	25	4.82	+	5.19	7.35e-11	1.9e-08
regulation of cellular process (GO:0050794)	7789	164	106.9	+	1.53	9.04e-11	2.27e-08
neuron projection development (GO:0031175)	418	27	5.74	+	4.71	9.91e-11	2.41e-08
tissue morphogenesis (GO:0048729)	366	25	5.02	+	4.98	1.68e-10	3.98e-08
neuron development (GO:0048666)	535	30	7.34	+	4.09	2.24e-10	5.15e-08
chemotaxis (GO:0006935)	350	24	4.8	+	5	3.67e-10	8.23e-08
cell surface receptor signaling pathway (GO:0007166)	1358	50	18.64	+	2.68	3.94e-10	8.61e-08
central nervous system development (GO:0007417)	450	27	6.18	+	4.37	4.62e-10	9.85e-08
cellular component morphogenesis (GO:0032989)	422	26	5.79	+	4.49	5.79e-10	1.2e-07
taxis (GO:0042330)	361	24	4.95	+	4.84	6.57e-10	1.33e-07
ameboidal-type cell migration (GO:0001667)	175	17	2.4	+	7.08	1.19e-09	2.36e-07
cell migration (GO:0016477)	511	28	7.01	+	3.99	1.49e-09	2.89e-07
hindbrain development (GO:0030902)	74	12	1.02	+	11.82	1.93e-09	3.66e-07
embryo development (GO:0009790)	743	34	10.2	+	3.33	2.1e-09	3.89e-07
regulation of neuron projection development (GO:0010975)	136	15	1.87	+	8.04	2.34e-09	4.25e-07
localization of cell (GO:0051674)	550	28	7.55	+	3.71	6.9e-09	1.23e-06
cell motility (GO:0048870)	550	28	7.55	+	3.71	6.9e-09	1.2e-06
mesenchymal cell differentiation (GO:0048762)	128	14	1.76	+	7.97	8.88e-09	1.51e-06
regulation of signal transduction (GO:0009966)	1048	40	14.38	+	2.78	1.06e-08	1.77e-06
neural crest cell development (GO:0014032)	108	13	1.48	+	8.77	1.07e-08	1.75e-06
mesenchymal cell development (GO:0014031)	108	13	1.48	+	8.77	1.07e-08	1.72e-06
stem cell development (GO:0048864)	108	13	1.48	+	8.77	1.07e-08	1.69e-06
regulation of neurogenesis (GO:0050767)	131	14	1.8	+	7.79	1.16e-08	1.8e-06
neural crest cell migration (GO:0001755)	89	12	1.22	+	9.82	1.26e-08	1.91e-06
cell-cell adhesion (GO:0098609)	325	21	4.46	+	4.71	1.26e-08	1.89e-06
mesenchyme development (GO:0060485)	159	15	2.18	+	6.87	1.64e-08	2.41e-06
regulation of multicellular organismal development (GO:2000026)	299	20	4.1	+	4.87	1.65e-08	2.38e-06
negative regulation of response to stimulus (GO:0048585)	430	24	5.9	+	4.07	1.66e-08	2.36e-06
negative regulation of biological process (GO:0048519)	1817	56	24.94	+	2.25	1.7e-08	2.37e-06
regulation of anatomical structure morphogenesis (GO:0022603)	270	19	3.71	+	5.13	1.77e-08	2.43e-06
regulation of plasma membrane bounded cell projection organization (GO:0120035)	186	16	2.55	+	6.27	1.82e-08	2.46e-06
semaphorin-plexin signaling pathway (GO:0071526)	56	10	0.77	+	13.01	1.94e-08	2.59e-06
regulation of cell projection organization (GO:0031344)	187	16	2.57	+	6.23	1.95e-08	2.56e-06
neural crest cell differentiation (GO:0014033)	117	13	1.61	+	8.1	2.56e-08	3.3e-06
regulation of nervous system development (GO:0051960)	143	14	1.96	+	7.13	3.22e-08	4.1e-06
epithelium development (GO:0060429)	563	27	7.73	+	3.49	4.2e-08	5.27e-06
cell adhesion (GO:0007155)	605	28	8.3	+	3.37	4.77e-08	5.9e-06
biological adhesion (GO:0022610)	605	28	8.3	+	3.37	4.77e-08	5.81e-06
negative regulation of multicellular organismal process (GO:0051241)	127	13	1.74	+	7.46	6.21e-08	7.46e-06
regulation of cell communication (GO:0010646)	1199	42	16.46	+	2.55	7.43e-08	8.8e-06
regulation of cell development (GO:0060284)	154	14	2.11	+	6.62	7.58e-08	8.85e-06
regulation of signaling (GO:0023051)	1203	42	16.51	+	2.54	7.7e-08	8.87e-06
brain development (GO:0007420)	301	19	4.13	+	4.6	8.93e-08	1.01e-05
negative regulation of canonical Wnt signaling pathway (GO:0090090)	50	9	0.69	+	13.11	9.49e-08	1.06e-05
regulation of response to stimulus (GO:0048583)	1408	46	19.32	+	2.38	1.02e-07	1.13e-05
negative regulation of cellular process (GO:0048523)	1638	50	22.48	+	2.22	1.55e-07	1.7e-05
head development (GO:0060322)	313	19	4.3	+	4.42	1.58e-07	1.71e-05
anatomical structure formation involved in morphogenesis (GO:0048646)	534	25	7.33	+	3.41	2.09e-07	2.23e-05
cell projection organization (GO:0030030)	700	29	9.61	+	3.02	2.57e-07	2.71e-05
stem cell differentiation (GO:0048863)	147	13	2.02	+	6.44	2.98e-07	3.1e-05
plasma membrane bounded cell projection organization (GO:0120036)	676	28	9.28	+	3.02	4.19e-07	4.31e-05
regulation of multicellular organismal process (GO:0051239)	556	25	7.63	+	3.28	4.29e-07	4.35e-05
positive regulation of cell differentiation (GO:0045597)	105	11	1.44	+	7.63	5.25e-07	5.27e-05
cellular nitrogen compound metabolic process (GO:0034641)	2418	9	33.19	-	0.27	6.13e-07	6.07e-05
embryonic morphogenesis (GO:0048598)	493	23	6.77	+	3.4	6.88e-07	6.74e-05
morphogenesis of an epithelium (GO:0002009)	313	18	4.3	+	4.19	7.09e-07	6.86e-05
negative regulation of developmental process (GO:0051093)	134	12	1.84	+	6.52	7.55e-07	7.23e-05
extracellular structure organization (GO:0043062)	191	14	2.62	+	5.34	8.7e-07	8.24e-05
external encapsulating structure organization (GO:0045229)	191	14	2.62	+	5.34	8.7e-07	8.15e-05
extracellular matrix organization (GO:0030198)	191	14	2.62	+	5.34	8.7e-07	8.06e-05
biological_process (GO:0008150)	17022	272	233.62	+	1.16	9.21e-07	8.44e-05
Unclassified (UNCLASSIFIED)	6585	52	90.38	-	0.58	9.21e-07	8.35e-05
cell-cell adhesion via plasma-membrane adhesion molecules (GO:0098742)	229	15	3.14	+	4.77	1.34e-06	0.00012
circulatory system development (GO:0072359)	635	26	8.72	+	2.98	1.35e-06	0.00012
negative regulation of Wnt signaling pathway (GO:0030178)	73	9	1	+	8.98	1.68e-06	0.000148
tube development (GO:0035295)	495	22	6.79	+	3.24	2.57e-06	0.000224
signal transduction (GO:0007165)	3454	80	47.41	+	1.69	2.6e-06	0.000224
Wnt signaling pathway (GO:0016055)	126	11	1.73	+	6.36	2.75e-06	0.000234
cell-cell signaling by wnt (GO:0198738)	126	11	1.73	+	6.36	2.75e-06	0.000232
blood vessel morphogenesis (GO:0048514)	244	15	3.35	+	4.48	2.8e-06	0.000234
pattern specification process (GO:0007389)	383	19	5.26	+	3.61	2.8e-06	0.000232
negative regulation of signal transduction (GO:0009968)	350	18	4.8	+	3.75	3.19e-06	0.000261
semaphorin-plexin signaling pathway involved in axon guidance (GO:1902287)	13	5	0.18	+	28.02	3.27e-06	0.000265
semaphorin-plexin signaling pathway involved in neuron projection guidance (GO:1902285)	13	5	0.18	+	28.02	3.27e-06	0.000263
regulation of cell migration (GO:0030334)	186	13	2.55	+	5.09	3.5e-06	0.000279
vasculature development (GO:0001944)	320	17	4.39	+	3.87	3.98e-06	0.000314
organic cyclic compound metabolic process (GO:1901360)	2123	8	29.14	-	0.27	4.5e-06	0.000352
tube morphogenesis (GO:0035239)	400	19	5.49	+	3.46	5.1e-06	0.000395
gene expression (GO:0010467)	1283	2	17.61	-	0.11	5.1e-06	0.000392
negative regulation of cell communication (GO:0010648)	368	18	5.05	+	3.56	6.18e-06	0.00047
negative regulation of signaling (GO:0023057)	368	18	5.05	+	3.56	6.18e-06	0.000466
regulation of cell motility (GO:2000145)	199	13	2.73	+	4.76	6.99e-06	0.000523
nucleobase-containing compound metabolic process (GO:0006139)	1924	7	26.41	-	0.27	7.97e-06	0.00059
blood vessel development (GO:0001568)	273	15	3.75	+	4	1.01e-05	0.000742
animal organ morphogenesis (GO:0009887)	585	23	8.03	+	2.86	1.05e-05	0.000766
regulation of locomotion (GO:0040012)	210	13	2.88	+	4.51	1.2e-05	0.00087
regulation of cellular component movement (GO:0051270)	210	13	2.88	+	4.51	1.2e-05	0.000863
heterocycle metabolic process (GO:0046483)	2008	8	27.56	-	0.29	1.21e-05	0.000858
cellular aromatic compound metabolic process (GO:0006725)	2031	8	27.87	-	0.29	1.24e-05	0.000871
positive regulation of axonogenesis (GO:0050772)	34	6	0.47	+	12.86	1.53e-05	0.00107
positive regulation of neurogenesis (GO:0050769)	53	7	0.73	+	9.62	1.63e-05	0.00113
cell population proliferation (GO:0008283)	75	8	1.03	+	7.77	1.69e-05	0.00116
cellular response to stimulus (GO:0051716)	4140	88	56.82	+	1.55	1.88e-05	0.00128
regulation of canonical Wnt signaling pathway (GO:0060828)	101	9	1.39	+	6.49	1.92e-05	0.0013
signaling (GO:0023052)	3708	81	50.89	+	1.59	2.15e-05	0.00144
response to stimulus (GO:0050896)	4895	100	67.18	+	1.49	2.39e-05	0.00159
cell communication (GO:0007154)	3748	81	51.44	+	1.57	2.47e-05	0.00163
positive regulation of nervous system development (GO:0051962)	58	7	0.8	+	8.79	2.78e-05	0.00182
positive regulation of developmental process (GO:0051094)	167	11	2.29	+	4.8	3.31e-05	0.00215
homophilic cell adhesion via plasma membrane adhesion molecules (GO:0007156)	201	12	2.76	+	4.35	3.64e-05	0.00235
regulation of cellular component organization (GO:0051128)	729	25	10.01	+	2.5	3.95e-05	0.00253
regionalization (GO:0003002)	242	13	3.32	+	3.91	4.9e-05	0.00312
sensory system development (GO:0048880)	393	17	5.39	+	3.15	4.95e-05	0.00313
enzyme linked receptor protein signaling pathway (GO:0007167)	354	16	4.86	+	3.29	5.02e-05	0.00315
regulation of Wnt signaling pathway (GO:0030111)	145	10	1.99	+	5.02	5.23e-05	0.00325
positive regulation of cell development (GO:0010720)	65	7	0.89	+	7.85	5.42e-05	0.00335
cell surface receptor signaling pathway involved in cell-cell signaling (GO:1905114)	180	11	2.47	+	4.45	6.28e-05	0.00385
RNA metabolic process (GO:0016070)	929	1	12.75	-	0.08	6.38e-05	0.00388
response to chemical (GO:0042221)	1370	38	18.8	+	2.02	6.4e-05	0.00387
regulation of cell shape (GO:0008360)	67	7	0.92	+	7.61	6.47e-05	0.00388
sensory organ development (GO:0007423)	446	18	6.12	+	2.94	7.03e-05	0.00419
cell proliferation in hindbrain (GO:0021534)	4	3	0.05	+	54.65	8.27e-05	0.00489
cellular metabolic process (GO:0044237)	6057	53	83.13	-	0.64	8.53e-05	0.00501
negative regulation of growth (GO:0045926)	49	6	0.67	+	8.92	9.75e-05	0.00569
negative regulation of locomotion (GO:0040013)	73	7	1	+	6.99	0.000107	0.00618
angiogenesis (GO:0001525)	193	11	2.65	+	4.15	0.000113	0.00652
response to external stimulus (GO:0009605)	908	28	12.46	+	2.25	0.000114	0.00653
negative regulation of nervous system development (GO:0051961)	51	6	0.7	+	8.57	0.000119	0.00678
negative regulation of neurogenesis (GO:0050768)	51	6	0.7	+	8.57	0.000119	0.00674
negative regulation of cell projection organization (GO:0031345)	53	6	0.73	+	8.25	0.000145	0.00812
regulation of extent of cell growth (GO:0061387)	77	7	1.06	+	6.62	0.000145	0.00808
nucleic acid metabolic process (GO:0090304)	1554	6	21.33	-	0.28	0.00015	0.00831
neural precursor cell proliferation (GO:0061351)	17	4	0.23	+	17.14	0.000165	0.00905
regulation of cell morphogenesis (GO:0022604)	79	7	1.08	+	6.46	0.000168	0.00919
transmembrane receptor protein tyrosine kinase signaling pathway (GO:0007169)	241	12	3.31	+	3.63	0.000187	0.0101
negative regulation of cell development (GO:0010721)	56	6	0.77	+	7.81	0.000191	0.0103
metabolic process (GO:0008152)	6847	64	93.97	-	0.68	0.000202	0.0108
cellular nitrogen compound biosynthetic process (GO:0044271)	994	2	13.64	-	0.15	0.000209	0.0111
negative regulation of cell adhesion (GO:0007162)	58	6	0.8	+	7.54	0.000228	0.0121
embryonic eye morphogenesis (GO:0048048)	37	5	0.51	+	9.85	0.000249	0.0131
morphogenesis of an epithelial sheet (GO:0002011)	60	6	0.82	+	7.29	0.00027	0.0141
negative regulation of cell differentiation (GO:0045596)	86	7	1.18	+	5.93	0.000274	0.0142
chordate embryonic development (GO:0043009)	333	14	4.57	+	3.06	0.0003	0.0155
biosynthetic process (GO:0009058)	1807	9	24.8	-	0.36	0.000302	0.0155
embryonic organ development (GO:0048568)	417	16	5.72	+	2.8	0.000304	0.0155
embryo development ending in birth or egg hatching (GO:0009792)	334	14	4.58	+	3.05	0.000308	0.0156
regulation of cell growth (GO:0001558)	88	7	1.21	+	5.8	0.000312	0.0157
anterior/posterior pattern specification (GO:0009952)	149	9	2.04	+	4.4	0.000315	0.0158
organic substance metabolic process (GO:0071704)	6506	61	89.29	-	0.68	0.00034	0.017
cellular component organization (GO:0016043)	3497	72	48	+	1.5	0.00039	0.0193
negative regulation of axon extension (GO:0030517)	42	5	0.58	+	8.67	0.000425	0.0209
negative regulation of axonogenesis (GO:0050771)	42	5	0.58	+	8.67	0.000425	0.0208
regulation of catalytic activity (GO:0050790)	1252	33	17.18	+	1.92	0.000428	0.0208
regulation of axon extension (GO:0030516)	66	6	0.91	+	6.62	0.000434	0.021
regulation of developmental growth (GO:0048638)	94	7	1.29	+	5.43	0.000453	0.0218
regulation of cellular metabolic process (GO:0031323)	3440	71	47.21	+	1.5	0.000467	0.0224
regulation of growth (GO:0040008)	126	8	1.73	+	4.63	0.000493	0.0235
anterior/posterior axon guidance (GO:0033564)	9	3	0.12	+	24.29	0.000494	0.0234
regulation of cell size (GO:0008361)	96	7	1.32	+	5.31	0.00051	0.024
negative regulation of developmental growth (GO:0048640)	44	5	0.6	+	8.28	0.000516	0.0242
organic substance biosynthetic process (GO:1901576)	1766	9	24.24	-	0.37	0.000559	0.026
skeletal system development (GO:0001501)	274	12	3.76	+	3.19	0.000566	0.0262
negative regulation of cell growth (GO:0030308)	46	5	0.63	+	7.92	0.000622	0.0287
camera-type eye development (GO:0043010)	278	12	3.82	+	3.15	0.00064	0.0293
RNA processing (GO:0006396)	584	0	8.02	-	0	0.000739	0.0337
negative regulation of neuron projection development (GO:0010977)	48	5	0.66	+	7.59	0.000743	0.0337
motor neuron axon guidance (GO:0008045)	27	4	0.37	+	10.79	0.000778	0.0351
regulation of hydrolase activity (GO:0051336)	573	19	7.86	+	2.42	0.000781	0.035
regulation of RNA biosynthetic process (GO:2001141)	2246	50	30.83	+	1.62	0.000808	0.036
regulation of transcription, DNA-templated (GO:0006355)	2246	50	30.83	+	1.62	0.000808	0.0359
regulation of nucleic acid-templated transcription (GO:1903506)	2246	50	30.83	+	1.62	0.000808	0.0357
skeletal muscle tissue development (GO:0007519)	75	6	1.03	+	5.83	0.000814	0.0358
eye development (GO:0001654)	328	13	4.5	+	2.89	0.000826	0.0361
visual system development (GO:0150063)	328	13	4.5	+	2.89	0.000826	0.0359
regulation of cell population proliferation (GO:0042127)	247	11	3.39	+	3.24	0.000835	0.0361
positive regulation of cell projection organization (GO:0031346)	76	6	1.04	+	5.75	0.000868	0.0374
posterior lateral line neuromast development (GO:0048919)	28	4	0.38	+	10.41	0.000879	0.0377
regulation of molecular function (GO:0065009)	1428	35	19.6	+	1.79	0.000994	0.0424
cellular biosynthetic process (GO:0044249)	1699	9	23.32	-	0.39	0.001	0.0426
striated muscle tissue development (GO:0014706)	142	8	1.95	+	4.1	0.00103	0.0436
protein depalmitoleylation (GO:1990697)	2	2	0.03	+	72.86	0.00108	0.0452
protein-containing complex assembly (GO:0065003)	560	0	7.69	-	0	0.00113	0.0471
regulation of nitrogen compound metabolic process (GO:0051171)	3251	66	44.62	+	1.48	0.00115	0.0477
regulation of RNA metabolic process (GO:0051252)	2400	52	32.94	+	1.58	0.00115	0.0477
regulation of transcription by RNA polymerase II (GO:0006357)	1835	42	25.18	+	1.67	0.00119	0.049
medial fin development (GO:0033338)	13	3	0.18	+	16.81	0.00121	0.0495
