# Supplementary material for: Wnt11 acts on dermomyotome cells to guide epaxial myotome morphogenesis
Source: eLife. 2022 May 6;11:e71845. doi: 10.7554/eLife.71845 (PMC9075960; doi:10.7554/eLife.71845)
Supplement: Supplementary file 3. [file elife-71845-supp3.xlsx]

## Sheet: Sheet1
Analysis Type:	PANTHER Overrepresentation Test (Released 20210224)
Annotation Version and Release Date:	GO Ontology database DOI: 10.5281/zenodo.4495804 Released 2021-02-01
Analyzed List:	ventral_Zic1Targets (Oryzias latipes)
Reference List:	Oryzias latipes (all genes in database)
Test Type:	FISHER
Correction:	FDR
GO biological process complete	Oryzias latipes - REFLIST (23607)	ventral_Zic1Targets (191)	ventral_Zic1Targets (expected)	ventral_Zic1Targets (over/under)	ventral_Zic1Targets (fold Enrichment)	ventral_Zic1Targets (raw P-value)	ventral_Zic1Targets (FDR)
anatomical structure development (GO:0048856)	3288	84	26.6	+	3.16	1.34e-23	1.14e-19
developmental process (GO:0032502)	3449	86	27.91	+	3.08	1.43e-23	6.11e-20
multicellular organism development (GO:0007275)	3004	78	24.3	+	3.21	4.9e-22	1.39e-18
multicellular organismal process (GO:0032501)	3747	87	30.32	+	2.87	8.16e-22	1.74e-18
system development (GO:0048731)	2562	69	20.73	+	3.33	5.38e-20	9.18e-17
anatomical structure morphogenesis (GO:0009653)	1504	51	12.17	+	4.19	1.92e-18	2.72e-15
cell differentiation (GO:0030154)	1695	48	13.71	+	3.5	2.14e-14	2.6e-11
cellular developmental process (GO:0048869)	1707	48	13.81	+	3.48	2.77e-14	2.95e-11
animal organ development (GO:0048513)	1739	45	14.07	+	3.2	3.56e-12	3.37e-09
circulatory system development (GO:0072359)	635	27	5.14	+	5.26	4.2e-12	3.58e-09
anatomical structure formation involved in morphogenesis (GO:0048646)	534	24	4.32	+	5.55	2.43e-11	1.88e-08
regulation of biological process (GO:0050789)	8123	111	65.72	+	1.69	3.49e-11	2.48e-08
regulation of cellular process (GO:0050794)	7789	108	63.02	+	1.71	3.69e-11	2.42e-08
biological regulation (GO:0065007)	8948	117	72.4	+	1.62	9.57e-11	5.82e-08
tube development (GO:0035295)	495	22	4	+	5.49	2.14e-10	1.21e-07
blood vessel development (GO:0001568)	273	17	2.21	+	7.7	2.18e-10	1.16e-07
vasculature development (GO:0001944)	320	18	2.59	+	6.95	2.98e-10	1.5e-07
animal organ morphogenesis (GO:0009887)	585	23	4.73	+	4.86	8e-10	3.79e-07
angiogenesis (GO:0001525)	193	14	1.56	+	8.97	1.43e-09	6.42e-07
nervous system development (GO:0007399)	1241	33	10.04	+	3.29	2.33e-09	9.95e-07
tissue development (GO:0009888)	986	29	7.98	+	3.64	2.85e-09	1.16e-06
cell surface receptor signaling pathway (GO:0007166)	1358	34	10.99	+	3.09	5.67e-09	2.2e-06
tube morphogenesis (GO:0035239)	400	18	3.24	+	5.56	8.56e-09	3.17e-06
locomotion (GO:0040011)	735	24	5.95	+	4.04	1.12e-08	3.98e-06
neurogenesis (GO:0022008)	799	25	6.46	+	3.87	1.22e-08	4.17e-06
blood vessel morphogenesis (GO:0048514)	244	14	1.97	+	7.09	2.4e-08	7.86e-06
cell morphogenesis (GO:0000902)	439	18	3.55	+	5.07	3.35e-08	1.06e-05
embryonic morphogenesis (GO:0048598)	493	19	3.99	+	4.76	3.52e-08	1.07e-05
axon guidance (GO:0007411)	213	13	1.72	+	7.54	3.89e-08	1.14e-05
neuron projection guidance (GO:0097485)	214	13	1.73	+	7.51	4.1e-08	1.16e-05
epithelium development (GO:0060429)	563	20	4.56	+	4.39	5.48e-08	1.51e-05
movement of cell or subcellular component (GO:0006928)	889	25	7.19	+	3.48	9.1e-08	2.42e-05
biological_process (GO:0008150)	17022	168	137.72	+	1.22	2.23e-07	5.75e-05
Unclassified (UNCLASSIFIED)	6585	23	53.28	-	0.43	2.23e-07	5.58e-05
cellular metabolic process (GO:0044237)	6057	20	49.01	-	0.41	2.62e-07	6.37e-05
generation of neurons (GO:0048699)	746	22	6.04	+	3.64	2.64e-07	6.24e-05
regulation of signal transduction (GO:0009966)	1048	26	8.48	+	3.07	5.21e-07	0.00012
cell morphogenesis involved in differentiation (GO:0000904)	371	15	3	+	5	5.8e-07	0.00013
cell morphogenesis involved in neuron differentiation (GO:0048667)	321	14	2.6	+	5.39	5.9e-07	0.000129
axonogenesis (GO:0007409)	297	13	2.4	+	5.41	1.45e-06	0.000309
enzyme linked receptor protein signaling pathway (GO:0007167)	354	14	2.86	+	4.89	1.79e-06	0.000372
embryonic organ morphogenesis (GO:0048562)	304	13	2.46	+	5.29	1.86e-06	0.000377
regulation of cell communication (GO:0010646)	1199	27	9.7	+	2.78	1.89e-06	0.000375
regulation of signaling (GO:0023051)	1203	27	9.73	+	2.77	2.01e-06	0.00039
embryonic organ development (GO:0048568)	417	15	3.37	+	4.45	2.35e-06	0.000444
axon development (GO:0061564)	311	13	2.52	+	5.17	2.36e-06	0.000438
morphogenesis of an epithelium (GO:0002009)	313	13	2.53	+	5.13	2.53e-06	0.000459
tissue morphogenesis (GO:0048729)	366	14	2.96	+	4.73	2.6e-06	0.000462
cell adhesion (GO:0007155)	605	18	4.89	+	3.68	3.05e-06	0.000531
biological adhesion (GO:0022610)	605	18	4.89	+	3.68	3.05e-06	0.00052
neuron differentiation (GO:0030182)	677	19	5.48	+	3.47	3.65e-06	0.00061
embryo development (GO:0009790)	743	20	6.01	+	3.33	3.68e-06	0.000603
skeletal system development (GO:0001501)	274	12	2.22	+	5.41	3.7e-06	0.000594
regulation of cellular response to growth factor stimulus (GO:0090287)	108	8	0.87	+	9.16	4.51e-06	0.000712
developmental growth involved in morphogenesis (GO:0060560)	76	7	0.61	+	11.38	4.77e-06	0.000739
transmembrane receptor protein tyrosine kinase signaling pathway (GO:0007169)	241	11	1.95	+	5.64	6.51e-06	0.000991
regulation of transmembrane receptor protein serine/threonine kinase signaling pathway (GO:0090092)	114	8	0.92	+	8.67	6.56e-06	0.000981
neuron projection morphogenesis (GO:0048812)	343	13	2.78	+	4.68	6.58e-06	0.000967
plasma membrane bounded cell projection morphogenesis (GO:0120039)	343	13	2.78	+	4.68	6.58e-06	0.00095
dorsal convergence (GO:0060030)	12	4	0.1	+	41.2	6.79e-06	0.000964
cell projection morphogenesis (GO:0048858)	345	13	2.79	+	4.66	6.99e-06	0.000976
chemotaxis (GO:0006935)	350	13	2.83	+	4.59	8.11e-06	0.00111
cell part morphogenesis (GO:0032990)	351	13	2.84	+	4.58	8.35e-06	0.00113
non-canonical Wnt signaling pathway (GO:0035567)	31	5	0.25	+	19.93	9.73e-06	0.0013
negative regulation of cellular process (GO:0048523)	1638	31	13.25	+	2.34	1.1e-05	0.00145
taxis (GO:0042330)	361	13	2.92	+	4.45	1.11e-05	0.00144
neuron projection development (GO:0031175)	418	14	3.38	+	4.14	1.12e-05	0.00143
cellular component morphogenesis (GO:0032989)	422	14	3.41	+	4.1	1.24e-05	0.00156
metabolic process (GO:0008152)	6847	29	55.4	-	0.52	1.26e-05	0.00155
organic substance metabolic process (GO:0071704)	6506	27	52.64	-	0.51	1.37e-05	0.00167
cell development (GO:0048468)	958	22	7.75	+	2.84	1.37e-05	0.00165
negative regulation of biological process (GO:0048519)	1817	33	14.7	+	2.24	1.48e-05	0.00175
sprouting angiogenesis (GO:0002040)	60	6	0.49	+	12.36	1.5e-05	0.00176
regulation of response to stimulus (GO:0048583)	1408	28	11.39	+	2.46	1.85e-05	0.00213
signal transduction (GO:0007165)	3454	51	27.95	+	1.82	1.98e-05	0.00225
regulation of metabolic process (GO:0019222)	3719	53	30.09	+	1.76	2.47e-05	0.00277
regulation of cellular metabolic process (GO:0031323)	3440	50	27.83	+	1.8	3.12e-05	0.00346
regulation of nitrogen compound metabolic process (GO:0051171)	3251	48	26.3	+	1.82	3.19e-05	0.00349
canonical Wnt signaling pathway (GO:0060070)	70	6	0.57	+	10.59	3.39e-05	0.00366
regulation of macromolecule metabolic process (GO:0060255)	3471	50	28.08	+	1.78	3.55e-05	0.00378
regionalization (GO:0003002)	242	10	1.96	+	5.11	3.89e-05	0.00409
embryonic camera-type eye formation (GO:0060900)	22	4	0.18	+	22.47	5.23e-05	0.00544
regulation of primary metabolic process (GO:0080090)	3307	48	26.76	+	1.79	5.73e-05	0.00588
primary metabolic process (GO:0044238)	6116	26	49.48	-	0.53	5.86e-05	0.00595
integrin-mediated signaling pathway (GO:0007229)	49	5	0.4	+	12.61	7.26e-05	0.00728
sensory organ morphogenesis (GO:0090596)	212	9	1.72	+	5.25	7.81e-05	0.00774
cellular macromolecule metabolic process (GO:0044260)	3929	13	31.79	-	0.41	8.21e-05	0.00804
epithelial cell differentiation (GO:0030855)	167	8	1.35	+	5.92	8.81e-05	0.00853
pattern specification process (GO:0007389)	383	12	3.1	+	3.87	8.91e-05	0.00853
sensory organ development (GO:0007423)	446	13	3.61	+	3.6	9.19e-05	0.0087
cell migration (GO:0016477)	511	14	4.13	+	3.39	9.35e-05	0.00875
Wnt signaling pathway (GO:0016055)	126	7	1.02	+	6.87	0.000102	0.00945
cell-cell signaling by wnt (GO:0198738)	126	7	1.02	+	6.87	0.000102	0.00935
cell migration involved in gastrulation (GO:0042074)	53	5	0.43	+	11.66	0.000103	0.0093
response to stimulus (GO:0050896)	4895	63	39.6	+	1.59	0.000103	0.00926
sensory system development (GO:0048880)	393	12	3.18	+	3.77	0.000113	0.01
muscle contraction (GO:0006936)	89	6	0.72	+	8.33	0.000119	0.0104
ameboidal-type cell migration (GO:0001667)	175	8	1.42	+	5.65	0.00012	0.0104
signaling (GO:0023052)	3708	51	30	+	1.7	0.000128	0.011
cell communication (GO:0007154)	3748	51	30.32	+	1.68	0.000142	0.0121
neuron development (GO:0048666)	535	14	4.33	+	3.23	0.000149	0.0126
muscle system process (GO:0003012)	93	6	0.75	+	7.97	0.000149	0.0125
nitrogen compound metabolic process (GO:0006807)	5617	24	45.45	-	0.53	0.000153	0.0127
negative regulation of signal transduction (GO:0009968)	350	11	2.83	+	3.88	0.000171	0.014
axis elongation (GO:0003401)	31	4	0.25	+	15.95	0.000173	0.0141
embryonic camera-type eye morphogenesis (GO:0048596)	31	4	0.25	+	15.95	0.000173	0.0139
regulation of BMP signaling pathway (GO:0030510)	61	5	0.49	+	10.13	0.00019	0.0151
cartilage development (GO:0051216)	98	6	0.79	+	7.57	0.000195	0.0154
localization of cell (GO:0051674)	550	14	4.45	+	3.15	0.000197	0.0154
cell motility (GO:0048870)	550	14	4.45	+	3.15	0.000197	0.0152
cellular response to growth factor stimulus (GO:0071363)	141	7	1.14	+	6.14	0.000198	0.0152
response to growth factor (GO:0070848)	141	7	1.14	+	6.14	0.000198	0.0151
heart development (GO:0007507)	357	11	2.89	+	3.81	0.000202	0.0152
extracellular structure organization (GO:0043062)	191	8	1.55	+	5.18	0.000213	0.016
external encapsulating structure organization (GO:0045229)	191	8	1.55	+	5.18	0.000213	0.0158
extracellular matrix organization (GO:0030198)	191	8	1.55	+	5.18	0.000213	0.0157
growth (GO:0040007)	192	8	1.55	+	5.15	0.000221	0.0161
developmental growth (GO:0048589)	192	8	1.55	+	5.15	0.000221	0.0159
regulation of transcription by RNA polymerase II (GO:0006357)	1835	30	14.85	+	2.02	0.000222	0.0159
connective tissue development (GO:0061448)	102	6	0.83	+	7.27	0.00024	0.017
macromolecule metabolic process (GO:0043170)	5065	21	40.98	-	0.51	0.000251	0.0177
negative regulation of response to stimulus (GO:0048585)	430	12	3.48	+	3.45	0.000252	0.0176
cellular response to stimulus (GO:0051716)	4140	54	33.5	+	1.61	0.000259	0.018
negative regulation of cell communication (GO:0010648)	368	11	2.98	+	3.69	0.00026	0.0178
negative regulation of signaling (GO:0023057)	368	11	2.98	+	3.69	0.00026	0.0177
vascular endothelial growth factor signaling pathway (GO:0038084)	13	3	0.11	+	28.52	0.000264	0.0178
embryonic eye morphogenesis (GO:0048048)	37	4	0.3	+	13.36	0.000323	0.0217
ephrin receptor signaling pathway (GO:0048013)	37	4	0.3	+	13.36	0.000323	0.0215
embryonic camera-type eye development (GO:0031076)	37	4	0.3	+	13.36	0.000323	0.0213
heterocycle metabolic process (GO:0046483)	2008	4	16.25	-	0.25	0.00037	0.0243
cellular aromatic compound metabolic process (GO:0006725)	2031	4	16.43	-	0.24	0.000371	0.0242
endocrine system development (GO:0035270)	73	5	0.59	+	8.47	0.000415	0.0268
regulation of RNA biosynthetic process (GO:2001141)	2246	34	18.17	+	1.87	0.000445	0.0285
regulation of transcription, DNA-templated (GO:0006355)	2246	34	18.17	+	1.87	0.000445	0.0283
regulation of nucleic acid-templated transcription (GO:1903506)	2246	34	18.17	+	1.87	0.000445	0.0281
regulation of nucleobase-containing compound metabolic process (GO:0019219)	2468	36	19.97	+	1.8	0.000513	0.0322
cellular response to vascular endothelial growth factor stimulus (GO:0035924)	17	3	0.14	+	21.81	0.000525	0.0326
nucleic acid metabolic process (GO:0090304)	1554	2	12.57	-	0.16	0.000553	0.0342
morphogenesis of embryonic epithelium (GO:0016331)	44	4	0.36	+	11.24	0.000594	0.0364
optic cup morphogenesis involved in camera-type eye development (GO:0002072)	18	3	0.15	+	20.6	0.000608	0.037
unidimensional cell growth (GO:0009826)	3	2	0.02	+	82.4	0.000631	0.0381
visceral serous pericardium development (GO:0061032)	3	2	0.02	+	82.4	0.000631	0.0379
regulation of RNA metabolic process (GO:0051252)	2400	35	19.42	+	1.8	0.000672	0.04
negative regulation of transmembrane receptor protein serine/threonine kinase signaling pathway (GO:0090101)	46	4	0.37	+	10.75	0.000694	0.0411
pectoral fin morphogenesis (GO:0035138)	19	3	0.15	+	19.52	0.0007	0.0412
nucleobase-containing compound metabolic process (GO:0006139)	1924	4	15.57	-	0.26	0.000745	0.0435
cell growth (GO:0016049)	47	4	0.38	+	10.52	0.000748	0.0434
cell surface receptor signaling pathway involved in cell-cell signaling (GO:1905114)	180	7	1.46	+	4.81	0.000808	0.0466
regulation of gene expression (GO:0010468)	2712	38	21.94	+	1.73	0.000854	0.0489
negative regulation of cellular response to growth factor stimulus (GO:0090288)	49	4	0.4	+	10.09	0.000866	0.0492
